# Supplementary material for: Identification of miR‐31‐5p, miR‐141‐3p, miR‐200c‐3p, and GLT1 as human liver aging markers sensitive to donor–recipient age‐mismatch in transplants
Source: PubMed Central journal article supplement (PMC5334540; doi:10.1111/acel.12549), 2016-12-20
Supplement: ACEL-16-262-s014.pdf [file ACEL-16-262-s014.pdf]

| DONOR LIVERS | GENDER M/F | AGE | Cause of death     | miRs Profiling | miRNAs validation | Telomer length | Affy Transcriptome | mRNA | Donor-recipient age-mismatch miRs | Donor-recipient age-mismatch Telomere length | IHC |
|--------------|------------|-----|--------------------|----------------|-------------------|----------------|--------------------|------|-----------------------------------|----------------------------------------------|-----|
| 88           | M          | 12  | Trauma             |                |                   |                |                    | 1    |                                   |                                              |     |
| 14           | M          | 13  | Trauma             | 1              | 1                 | 1              |                    | 1    |                                   |                                              |     |
| 16           | F          | 13  | Trauma             |                | 1                 | 1              |                    |      |                                   |                                              |     |
| 49           | M          | 16  | Trauma             |                | 1                 | 1              |                    |      |                                   |                                              |     |
| 4            | F          | 18  | Other              |                | 1                 | 1              |                    |      |                                   |                                              |     |
| 50           | F          | 18  | Trauma             |                | 1                 | 1              |                    |      |                                   |                                              |     |
| 39           | M          | 20  | Trauma             |                | 1                 | 1              | 1                  | 1    | 1                                 | 1                                            |     |
| 115          | M          | 21  | Trauma             |                |                   |                |                    |      |                                   |                                              | 1   |
| 17           | M          | 23  | Trauma             | 1              | 1                 | 1              | 1                  |      |                                   |                                              |     |
| 92           | M          | 24  | Anaphilatic schock |                |                   |                |                    |      |                                   |                                              | 1   |
| 20           | M          | 26  | Other              | 1              | 1                 | 1              | 1                  |      |                                   |                                              |     |
| 112          | M          | 27  | SVH                |                |                   |                |                    | 1    |                                   |                                              |     |
| 117          | F          | 28  | Other              |                |                   |                |                    |      |                                   |                                              | 1   |
| 22           | M          | 29  | Trauma             |                | 1                 | 1              | 1                  |      |                                   |                                              | 1   |
| 116          | F          | 29  | Trauma             |                |                   |                |                    |      |                                   |                                              | 1   |
| 5            | M          | 30  | Trauma             | 1              | 1                 | 1              | 1                  | 1    |                                   |                                              |     |
| 120          | F          | 34  | Asphyxia           |                |                   |                |                    |      |                                   |                                              | 1   |
| 10           | M          | 37  | Trauma             | 1              | 1                 | 1              | 1                  |      | 1                                 | 1                                            |     |
| 80           | M          | 37  | Trauma             |                |                   |                |                    | 1    |                                   |                                              |     |
| 119          | M          | 38  | Gunfire            |                |                   |                |                    |      |                                   |                                              | 1   |
| 6            | M          | 43  | SVH                | 1              | 1                 | 1              |                    |      | 1                                 | 1                                            |     |
| 44           | M          | 43  | SVH                |                |                   |                |                    | 1    |                                   |                                              |     |
| 7            | M          | 44  | SVH                | 1              | 1                 | 1              |                    | 1    |                                   |                                              |     |
| 45           | M          | 45  | Trauma             |                | 1                 | 1              |                    |      |                                   |                                              |     |
| 84           | M          | 49  | Meningitis         |                |                   |                |                    | 1    |                                   |                                              |     |
| 13           | F          | 50  | SVH                |                | 1                 | 1              |                    |      |                                   |                                              |     |
| 15           | M          | 50  | SVH                |                | 1                 | 1              |                    | 1    | 1                                 | 1                                            |     |
| 24           | M          | 50  | SVH                |                | 1                 | 1              |                    | 1    | 1                                 |                                              |     |
| 23           | F          | 53  | SVH                |                | 1                 | 1              |                    |      |                                   |                                              |     |
| 86           | F          | 53  | SVH                |                |                   |                |                    |      | 1                                 | 1                                            |     |
| 2            | M          | 58  | SVH                |                | 1                 | 1              |                    |      |                                   |                                              |     |
| 25           | F          | 58  | SVH                |                | 1                 | 1              |                    |      |                                   |                                              |     |
| 28           | M          | 58  | Trauma             | 1              | 1                 | 1              |                    |      |                                   |                                              |     |
| 54           | M          | 58  | SVH                |                |                   |                |                    | 1    |                                   |                                              |     |



|       |  |    |    |    |    |    |    |    |    |    |
|-------|--|----|----|----|----|----|----|----|----|----|
| TOTAL |  | 71 | 12 | 45 | 45 | 12 | 26 | 11 | 11 | 14 |
|-------|--|----|----|----|----|----|----|----|----|----|

SVH is Spontaneous vascular hemorrhage

Pink colour is referred to Female gender
