# Supplementary material for: Identification of miR‐31‐5p, miR‐141‐3p, miR‐200c‐3p, and GLT1 as human liver aging markers sensitive to donor–recipient age‐mismatch in transplants
Source: PubMed Central journal article supplement (PMC5334540; doi:10.1111/acel.12549), 2016-12-20
Supplement: ACEL-16-262-s015.pdf [file ACEL-16-262-s015.pdf]

| Blood samples |     |                                      |          |       |                   |                         |                     |                      |                       |                                                      |              |
|---------------|-----|--------------------------------------|----------|-------|-------------------|-------------------------|---------------------|----------------------|-----------------------|------------------------------------------------------|--------------|
| ID            | Age | Liver disease                        | anti-HCV | HBsAg | Donor age (years) | Δ AGE (Donor-Recipient) | Age-mismatch Groups | Pre-transplant blood | Post-transplant blood | Immunosuppressive drug therapy (induction)           | TBIL (mg/dL) |
| 1             | 62  | HCC with HCV-cirrhosis               | POS      | NEG   | 59                | -3                      | B                   |                      | N-Glycomics           | Tacrolimus, Steroids                                 | 3.3          |
| 3             | 51  | Cryptogenic cirrhosis                | NEG      | NEG   | 69                | 18                      | C                   |                      | N-Glycomics           | Tacrolimus, Steroids                                 | 9.2          |
| 6             | 57  | Alcoholic cirrhosis                  | NEG      | NEG   | 43                | -14                     | A                   |                      | N-Glycomics           | Tacrolimus, Steroids                                 | 3.7          |
| 9             | 42  | Alcoholic cirrhosis                  | NEG      | NEG   | 76                | 34                      | C                   |                      | N-Glycomics           | Tacrolimus, Steroids                                 | 12.0         |
| 10            | 52  | HCV-cirrhosis                        | POS      | NEG   | 37                | -15                     | A                   |                      | N-Glycomics           | Tacrolimus, Mycophenolate , Steroids                 | 0.6          |
| 17            | 46  | HCC with HCV and alcoholic cirrhosis | POS      | NEG   | 23                | -23                     | A                   |                      | N-Glycomics           | Tacrolimus, Steroids                                 | 12.2         |
| 19            | 60  | Alcoholic liver cirrhosis with HCC   | NEG      | NEG   | 87                | 27                      | C                   |                      | N-Glycomics           | Tacrolimus, Steroids                                 | 3.4          |
| 22            | 36  | HCC with HBV and HDV-cirrhosis       | NEG      | POS   | 29                | -7                      | B                   |                      | N-Glycomics           | Tacrolimus, Basiliximab, Steroids                    | 1.1          |
| 22            | 56  | Polycystic liver and kidney disease  | NEG      | NEG   | 29                | -27                     | A                   |                      | N-Glycomics           | Tacrolimus, Alemtuzumab                              | 0.3          |
| 24            | 66  | HCC with HCV-cirrhosis               | POS      | NEG   | 50                | -16                     | A                   |                      | N-Glycomics           | Tacrolimus, Steroids                                 | 16.8         |
| 27            | 64  | HCV-cirrhosis                        | POS      | NEG   | 67                | 3                       | B                   |                      | N-Glycomics           | Tacrolimus, Basiliximab, Steroids                    | 4.2          |
| 34            | 44  | HCC with HBV and HDV-cirrhosis       | NEG      | POS   | 90                | 46                      | C                   |                      | N-Glycomics           | Tacrolimus, Steroids                                 | 0.9          |
| 39            | 49  | Amyloidosis                          | NEG      | NEG   | 20                | -29                     | A                   |                      | N-Glycomics           | Thymoglobulin, Cyclosporine, Mycophenolate, Steroids | 2.0          |
| 40            | 66  | HCC with HCV-cirrhosis               | POS      | NEG   | 74                | 8                       | B                   |                      | N-Glycomics           | Everolimus, Steroids                                 | 43.1         |
| 41            | 64  | HCC with HCV-cirrhosis               | POS      | NEG   | 69                | 5                       | B                   |                      | N-Glycomics           | Tacrolimus, basiliximab, Steroids                    | 0.7          |
| 43            | 56  | Alcoholic cirrhosis                  | NEG      | NEG   | 74                | 18                      | C                   |                      | N-Glycomics           | Tacrolimus, Steroids                                 | 3.9          |
| 45            | 45  | HCV-cirrhosis                        | POS      | NEG   | 45                | 0                       | B                   |                      | N-Glycomics           | Tacrolimus, Basiliximab, Steroids                    | 10.4         |
| 46            | 57  | Alcoholic liver cirrhosis with HCC   | NEG      | NEG   | 75                | 18                      | C                   |                      | N-Glycomics           | Tacrolimus, Steroids                                 | 2.7          |
| 48            | 25  | Primary sclerosing cholangitis       | NEG      | NEG   | 78                | 53                      | C                   |                      | N-Glycomics           | Tacrolimus, Sirolimus, Steroids                      | 0.5          |
| 51            | 26  | HBV and HDV-cirrhosis                | NEG      | POS   | 70                | 44                      | C                   | N-Glycomics          | N-Glycomics           | Tacrolimus, Steroids                                 | 1.4          |
| 54            | 46  | HBV and HDV-cirrhosis                | NEG      | POS   | 58                | 12                      | C                   | N-Glycomics          | N-Glycomics           | Tacrolimus, Steroids                                 | 35.0         |

|     |    |                                     |     |     |    |     |  |   |             |             |                                    |      |
|-----|----|-------------------------------------|-----|-----|----|-----|--|---|-------------|-------------|------------------------------------|------|
| 55  | 50 | HCV-cirrhosis                       | POS | NEG | 68 | 18  |  | C | N-Glycomics | N-Glycomics | Tacrolimus, Basiliximab, Steroids  | 28.0 |
| 56  | 50 | Alcoholic cirrhosis                 | NEG | NEG | 74 | 24  |  | C | N-Glycomics | N-Glycomics | Tacrolimus, Steroids               | 3.7  |
| 78  | 40 | HCV-cirrhosis                       | POS | NEG | 71 | 31  |  | C | N-Glycomics | N-Glycomics | Tacrolimus, Basiliximab, Steroids  | 2.3  |
| 79  | 51 | HBV-cirrhosis                       | NEG | POS | 54 | 3   |  | B | N-Glycomics | N-Glycomics | Tacrolimus, Steroids               | 1.6  |
| 81  | 55 | HCC with HBV and HDV-cirrhosis      | NEG | POS | 89 | 34  |  | C | N-Glycomics | N-Glycomics | Tacrolimus, Steroids               | 0.4  |
| 84  | 49 | HCC with HBV-cirrhosis              | NEG | POS | 49 | 0   |  | B | N-Glycomics | N-Glycomics | Tacrolimus, Steroids               | 4.7  |
| 86  | 69 | HCC with HCV-cirrhosis              | POS | NEG | 53 | -16 |  | A | N-Glycomics | N-Glycomics | Tacrolimus, Basiliximab, Steroids  | 0.9  |
| 88  | 45 | HCC with HCV-cirrhosis              | POS | NEG | 12 | -33 |  | A | N-Glycomics | N-Glycomics | Tacrolimus, Basiliximab, Steroids  | 3.1  |
| 91  | 34 | Budd-Chiari syndrome                | NEG | NEG | 87 | 53  |  | C | N-Glycomics | N-Glycomics | Tacrolimus, Steroids               | 1.3  |
| 99  | 48 | HCC with HCV-cirrhosis              | POS | NEG | 73 | 25  |  | C | N-Glycomics | N-Glycomics | Tacrolimus , basiliximab, Steroids | 2.3  |
| 104 | 54 | HBV and HDV-cirrhosis               | NEG | POS | 88 | 34  |  | C |             | N-Glycomics | Tacrolimus, Steroids               | 12.6 |
| 107 | 52 | Polycystic liver and kidney disease | NEG | NEG | 64 | 12  |  | C |             | N-Glycomics | Tacrolimus, Steroids               | 0.3  |
| 109 | 58 | HCV-cirrhosis                       | POS | NEG | 65 | 7   |  | B |             | N-Glycomics | Tacrolimus, Steroids               | 1.7  |
| 114 | 46 | HBV and HDV-cirrhosis               | NEG | POS | 83 | 37  |  | C | N-Glycomics | N-Glycomics | Tacrolimus, Steroids               | 28.2 |
| 121 | 54 | Primary biliary cirrhosis           | NEG | NEG | 12 | -42 |  | A | N-Glycomics | N-Glycomics | Tacrolimus, Steroids               | 7.9  |

| Pre-Transplant biochemistry |               |            |            |            |            |                        |                                              | Post-transplant biochemistry |              |               |            |            |            |            |
|-----------------------------|---------------|------------|------------|------------|------------|------------------------|----------------------------------------------|------------------------------|--------------|---------------|------------|------------|------------|------------|
| IBIL (mg/dL)                | ALB (g/100mL) | AST (IU/L) | ALT (IU/L) | GGT (IU/L) | ALP (IU/L) | Months post transplant | Immunosuppressive drug therapy (maintenance) | TBIL (mg/dL)                 | IBIL (mg/dL) | ALB (g/100mL) | AST (IU/L) | ALT (IU/L) | GGT (IU/L) | ALP (IU/L) |
| 2.3                         | 4.0           | 43.0       | 36.0       | 15.0       | 224.0      | 20                     | Tacrolimus , Steroids                        | 1.5                          | 0.6          | 3.8           | 88.0       | 94.0       | 149.0      | 287.0      |
| 4.5                         | 3.1           | 42.0       | 19.0       |            |            | 8                      | Tacrolimus , Steroids                        | 1.3                          | 0.9          | 4.0           | 25.0       | 34.0       | 134.0      | 197.0      |
| 2.6                         | 4.7           | 39.0       | 30.0       | 15.0       | 69.0       | 23                     | Tacrolimus , Mycophenolate, Steroids         | 0.9                          | 0.7          | 4.5           | 15.0       | 17.0       | 59.0       | 269.0      |
| 4.0                         | 3.4           | 64.0       | 97.0       |            |            | 19                     | Tacrolimus , Mycophenolate                   | 0.3                          | 0.2          |               | 25.0       | 26.0       | 29.0       | 168.0      |
| 0.4                         | 3.0           | 54.0       | 63.0       |            |            | 19                     | Tacrolimus , Mycophenolate                   | 0.5                          | 0.2          | 4.0           | 101.0      | 114.0      | 176.0      | 265.0      |
| 4.0                         | 3.4           | 92.0       | 49.0       |            |            | 22                     | Sirolimus, Steroids                          | 0.5                          | 0.2          |               | 242.0      | 181.0      | 411.0      | 504.0      |
| 2.5                         | 3.8           | 25.0       | 17.0       |            |            | 20                     | Tacrolimus                                   | 0.5                          | 0.1          | 3.9           | 32.0       | 16.0       | 13.0       | 175.0      |
| 0.6                         | 4.8           | 44.0       | 72.0       |            |            | 17                     | Everolimus                                   | 0.6                          | 0.4          | 4.5           | 18.0       | 21.0       | 27.0       | 254.0      |
| 0.2                         | 4.7           | 21.0       | 8.0        |            |            | 17                     | Tacrolimus                                   | 0.7                          | 0.4          | 4.0           | 17.0       | 12.0       | 13.0       | 174.0      |
| 5.1                         | 3.2           | 390.0      | 398.0      | 37.0       | 152.0      | 18                     | Everolimus , Steroids                        | 0.5                          | 0.4          | 4.5           | 22.0       | 36.0       | 116.0      | 408.0      |
| 2.0                         | 3.0           | 28.0       | 15.0       | 15.0       | 263.0      | 19                     | Tacrolimus , Steroids                        | 0.5                          | 0.3          |               | 135.0      | 189.0      | 24.0       | 257.0      |
| 0.4                         | 4.3           | 45.0       | 59.0       | 64.0       | 138.0      | 1                      | Tacrolimus , Steroids                        | 1.2                          | 0.4          | 4.6           | 26.0       | 31.0       | 89.0       | 143.0      |
| 0.9                         | 5.0           | 19.0       | 25.0       |            |            | 8                      | Tacrolimus , Steroids                        | 0.7                          | 0.5          | 3.9           | 21.0       | 16.0       | 8.0        | 215.0      |
| 12.4                        | 4.2           | 47.0       | 17.0       |            |            | 11                     | Tacrolimus , Steroids                        | 2.4                          | 1.6          | 3.9           | 50.0       | 61.0       | 69.0       | 197.0      |
| 0.4                         | 4.1           | 31.0       | 27.0       | 21.0       | 221.0      | 22                     | Everolimus, Steroids                         | 1.0                          | 0.6          | 4.3           | 29.0       | 37.0       | 55.0       | 313.0      |
| 1.9                         | 3.4           | 23.0       | 9.0        |            |            | 22                     | Tacrolimus                                   | 0.8                          | 0.4          |               | 16.0       | 14.0       | 20.0       | 249.0      |
| 4.6                         | 4.5           | 75.0       | 46.0       |            |            | 26                     | Cyclosporine , Steroids                      | 0.8                          | 0.6          | 4.0           | 23.0       | 19.0       | 46.0       | 199.0      |
| 1.6                         | 4.3           | 45.0       | 30.0       | 112.0      | 267.0      | 10                     | Tacrolimus , Steroids                        | 0.8                          | 0.4          | 4.7           | 23.0       | 31.0       | 47.0       | 149.0      |
| 0.3                         | 4.6           | 63.0       | 79.0       |            |            | 8                      | Tacrolimus, Sirolimus , Steroids             | 1.4                          | 0.8          | 4.1           | 35.0       | 38.0       | 87.0       | 149.0      |
| 0.8                         | 3.3           | 78.0       | 60.0       |            |            | 7                      | Tacrolimus                                   | 0.3                          | 0.2          | 3.9           | 17.0       | 18.0       | 15.0       | 156.0      |
| 5.0                         | 4.5           | 107.0      | 62.0       |            |            | 12                     | Tacrolimus , Sirolimus , Steroids            | 0.6                          | 0.5          | 3.9           | 48.0       | 42.0       | 118.0      | 316.0      |

|     |     |        |        |       |       |    |                                   |     |     |     |       |       |       |       |
|-----|-----|--------|--------|-------|-------|----|-----------------------------------|-----|-----|-----|-------|-------|-------|-------|
| 3.5 | 3.0 | 120.0  | 36.0   | 181.0 | 294.0 | 5  | Cyclosporine , Steroids           | 2.7 | 1.8 | 2.7 | 104.0 | 95.0  | 554.0 | 347.0 |
| 2.2 | 3.8 | 36.0   | 16.0   |       |       | 13 | Tacrolimus , Sirolimus , Steroids | 0.3 | 0.2 |     | 21.0  | 19.0  | 19.0  | 310.0 |
| 0.4 | 3.2 | 141.0  | 92.0   | 160.0 | 360.0 | 8  | Tacrolimus , Steroids             | 1.9 | 0.5 | 4.0 | 88.0  | 64.0  |       |       |
| 0.7 | 3.3 | 46.0   | 47.0   |       |       | 6  | Tacrolimus , Sirolimus , Steroids | 0.9 | 0.5 |     | 45.0  | 52.0  | 291.0 | 355.0 |
| 0.3 | 4.3 | 26.0   | 7.0    |       |       | 18 | Sirolimus                         | 0.3 | 0.2 |     | 20.0  | 11.0  | 47.0  | 70.0  |
| 1.2 |     | 139.0  | 84.0   |       |       | 7  | Tacrolimus , Steroids             | 0.4 | 0.3 |     | 20.0  | 43.0  | 48.0  | 210.0 |
| 0.4 | 3.8 | 39.0   | 39.0   | 36.0  | 213.0 | 6  | Tacrolimus, Steroids              | 1.2 | 0.6 |     | 43.0  | 90.0  | 204.0 | 185.0 |
| 1.0 | 2.4 | 80.0   | 28.0   |       |       | 4  | Tacrolimus, Steroids              | 0.3 | 0.2 |     | 27.0  | 25.0  | 156.0 | 185.0 |
| 0.5 | 3.8 | 1352.0 | 2176.0 | 57.0  | 301.0 | 26 | Tacrolimus , Mycophenolate        | 0.4 | 0.2 |     | 21.0  | 17.0  | 13.0  | 54.0  |
| 0.9 | 3.4 | 173.0  | 174.0  |       |       | 7  | Tacrolimus, Steroids              | 0.9 | 0.5 |     | 177.0 | 187.0 | 251.0 | 386.0 |
| 6.3 | 3.0 | 66.0   | 25.0   |       |       | 25 | Tacrolimus                        | 1.2 | 0.7 |     | 15.0  | 8.0   | 9.0   | 116.0 |
| 0.1 | 4.5 | 8.0    | 12.0   | 46.0  | 183.0 | 23 | Tacrolimus, Steroids              | 0.6 | 0.4 |     | 15.0  | 20.0  | 15.0  | 85.0  |
| 0.8 | 3.6 | 49.0   | 33.0   |       |       | 9  | Cyclosporine , Steroids           | 1.1 | 0.3 | 4.1 | 55.0  | 61.0  | 45.0  | 164.0 |
| 4.7 | 3.8 | 112.0  | 46.0   | 20.0  | 161.0 | 20 | Tacrolimus                        | 0.4 | 0.3 |     | 17.0  | 15.0  | 42.0  | 129.0 |
| 2.1 | 3.4 | 135.0  | 134.0  |       |       | 14 | Tacrolimus, Steroids              | 0.5 | 0.3 |     | 18.0  | 17.0  | 8.0   | 77.0  |
